# Supplementary material for: A framework to find the logic backbone of a biological network
Source: PubMed Central journal article supplement (PMC5719532; doi:10.1186/s12918-017-0482-5), 2017-12-06
Supplement: 12918_2017_482_MOESM2_ESM.pdf [file 12918_2017_482_MOESM2_ESM.pdf]

## Proofs for Section 3.2: Properties of Logic Subgraphs

*Proposition:* A sufficient subgraph that does not contain any inhibitory edges cannot intersect a necessary cycle.

Proof: Let  $S_s$  be a sufficient subgraph and  $C_n$  be a necessary cycle. [ Here a cycle means a closed path and not a cyclic subgraph].

$I = S_s \cap C_n = \{\text{all nodes and edges in the intersection}\}$

Since  $C_n$  is a necessary cycle, all edges in it are necessary.

Let  $e$  be an edge,  $\forall e \in I$ ,  $e$  is necessary. Consider  $e = A \rightarrow B$ , then,  $A, B \in I \Rightarrow A, B \in S_s$ . In a sufficient subgraph (without inhibitory edges), the starting node must be sufficient for all the necessary regulators of any node (if it has necessary regulators).

Hence,  $start\_node(S_s)$  is sufficient  $\forall node \in predecessor\_set(B)$ .

Since  $B \in C_n$ , there exists a predecessor  $B'$  of  $B$  such that  $B' \in C_n$  and the  $start\_node(S_s)$  is sufficient for  $B$ , hence,  $B' \in S_s$ .

Now, there is a predecessor  $B''$  of  $B'$  such that  $B'' \in C_n$ ;  $start\_node(S_s)$  must also be sufficient for  $B''$  [since it is sufficient for all predecessors of  $B'$ ]. Hence, we have  $B'' \in S_s$ .

Iterating this argument shows that all nodes of  $C_n$  must lie in  $S_s$ . Now, if  $C_n \subset S_s$ , every node in  $C_n$  is a necessary regulator of some other node in  $C_n$ . Hence,  $start\_node(S_s)$  must be sufficient for every node of  $C_n$ , which would in turn depend on its being sufficient for another node [Since  $start\_node(S_s)$  cannot be directly sufficient to any of these nodes via an edge since such a combination of relationships is not possible]. We, hence, get into an infinite loop, which in turn prevents  $S_s$  from being a sufficient subgraph, which is a contradiction.

*Proposition:* A sufficient subgraph that contains inhibitory edges can intersect a necessary subgraph only if the intersection follows a sufficient inhibitory section.

Proof: Let  $S_s$  be a sufficient subgraph and  $C_n$  be a necessary cycle [Again, a cycle here is a closed path and not a cyclic subgraph].

$I = S_s \cap C_n = \{\text{all nodes and edges in the intersection}\}$ .

If  $start\_node(S_s)$  is fixed in the ON state, then all nodes in  $I$  would stabilize to a fixed state [It must be the same fixed state for all nodes: even if just one of them is OFF, the

rest would also stabilize to OFF as all nodes in  $I$  are a part of necessary cycle  $C_n$ ]. If that fixed state is ON, then  $start\_node(S_s)$  must be sufficient for each node of  $C_n$  which is not possible [as sketched in the above proof]. Hence that fixed state is OFF.

Pick any node  $n \in I$ . As  $start\_node(S_s)$  is fixed at ON,  $n$  would go to the OFF state implying that there must be a sufficient inhibitory section from  $start\_node(S_s)$  to  $n$ .

*Proposition:* *If there are two co-pointing subgraphs such that one is necessary while the other is sufficient and the source node of the sufficient subgraph is a signal node (i.e. zero in-degree), then*

1. *they must intersect*
2. *the starting node of the necessary subgraph must lie in the intersection*
3. *the starting node of the sufficient subgraph is sufficient for the starting node of the necessary subgraph.*

Proof: Let  $S_s$  be the sufficient subgraph and  $S_n$  be the necessary subgraph. Since these are co-pointing subgraphs, they have the same ending node, i.e.,  $end\_node(S_s) = end\_node(S_n) = T$ .

1. Consider the last edge of the  $S_s$  [the choice does not matter, we can alternatively consider the last edge of  $S_n$ ] which is incident on  $T$ .

Case I: This is a sufficient edge  $\Rightarrow$  other regulators of  $T$  are either necessary inhibitory or sufficient. No sort of subgraph or path followed by a necessary inhibitory or sufficient edge would yield a necessary subgraph [look at the columns corresponding to sufficient or necessary inhibitory in the chain function in Table 1: none of these contain necessary]. Hence, for  $S_n$  to exist in this scenario, there must be an intersection of  $S_n$  and  $S_s$  and that intersection must contain at least one of the regulators of  $T$ .

Case II: The last edge is necessary. For  $S_s$  (a sufficient subgraph) to end in a necessary edge,  $start\_node(S_s)$  must be sufficient (sufficient inhibitory) for all other necessary (sufficient inhibitory) regulators of  $T$ . Hence  $S_s$  contains all the regulators of  $T$ . Since  $S_n$  must go via at least one of the regulators of  $T$  [there is no other way to complete a subgraph to  $T$ ], there exists an intersection of  $S_n$  and  $S_s$ .

2.  $I = S_s \cap S_n$ . Assume that  $start\_node(S_n) \notin I$ .

By definition, a sufficient subgraph is a subgraph for which, if the starting node is set to ON, the ending node stabilizes to ON, and the nodes contained in the subgraph go to a fixed state, irrespective of the state of the rest of the network. If  $start\_node(S_n)$  is strictly outside of  $S_s$ , and  $start\_node(S_s)$  is set to ON, then  $T$  must stabilize to ON irrespective of the state of  $start\_node(S_n)$ . This violates the statement that  $start\_node(S_n)$  is necessary for  $T$ . Hence  $start\_node(S_n) \in I$ .

3. Now that we have established that  $start\_node(S_n) \in S_s$ , fixing  $start\_node(S_s)$  to ON would also stabilize the state of  $start\_node(S_n)$  to a fixed state [since it stabilizes the states of all the nodes in the subgraph]. Since  $start\_node(S_n)$  is necessary for  $T$ , this must be the ON state. Hence, we have that  $start\_node(S_s) = ON \Rightarrow start\_node(S_n) = ON$ , implying that  $start\_node(S_s)$  is sufficient for  $start\_node(S_n)$ .
